## INTRACELLULAR-MESSENGER-MEDIATED CATION CHANNELS IN CULTURED OLFACTORY RECEPTOR NEURONS

MONIKA STENGL\*

*Fakultät für Biologie, Universität Konstanz, Postfach 5560, 7750 Konstanz 1, Germany*  
and *ARL Division of Neurobiology, University of Arizona, Tucson, AZ85721, USA*

*Accepted 14 January 1993*

### Summary

After 2–3 weeks in culture, pupal olfactory receptor neurons from the antennae of male *Manduca sexta* respond to their species-specific sex pheromone by opening cation channels. These pheromone-dependent cation channels are the only channels previously found in cultured olfactory neurons that promote inward currents at membrane potentials more negative than the resting potential. The pheromone-dependent currents depend on external  $\text{Ca}^{2+}$  concentration. They are inwardly rectified with  $10^{-7} \text{ mol l}^{-1}$  external  $\text{Ca}^{2+}$  and linear with  $6 \text{ mmol l}^{-1}$  external  $\text{Ca}^{2+}$ . This paper shows that perfusion of cultured olfactory receptor neurons with  $\text{GTP}\gamma\text{S}$ , ATP, inositol 1,4,5,-trisphosphate or  $10^{-6} \text{ mol l}^{-1}$   $\text{Ca}^{2+}$  elicits cation currents resembling the pheromone-dependent cation currents in expressing inward rectification with  $10^{-7} \text{ mol l}^{-1}$  external  $\text{Ca}^{2+}$  and being linear at external  $\text{Ca}^{2+}$  concentrations of  $2 \mu\text{mol l}^{-1}$  or more. Stimulation with protein kinase C also elicits cation currents that share properties with the pheromone-dependent cation currents. All agent-induced cation currents appear to depend either directly or indirectly on  $\text{Ca}^{2+}$  concentration.

### Introduction

*Manduca sexta* females attract their conspecific mates through the release of a unique blend of sex pheromones (Starratt *et al.* 1979; Tumlinson *et al.* 1989). The males detect these pheromones with specialized olfactory receptor neurons (ORNs) which innervate long, male-specific sensilla trichodea on the male antennae (Sanes and Hildebrand, 1976a,b; Schweitzer *et al.* 1976; Keil, 1989; Christensen *et al.* 1989; Kaissling *et al.* 1989). After stimulation of pheromone-sensitive ORNs, sensillar potentials, which exhibit several different time constants and which show adaptation after a strong pheromone stimulus, can be recorded extracellularly (Schneider, 1962; Schneider and Boeckh, 1962; Zack-Strausfeld, 1979; Kaissling and Thorson, 1980; Kaissling, 1987; Zack-Strausfeld and Kaissling, 1986; Kaissling *et al.* 1987; Vogt, 1987). Since the small ORNs are tightly covered by supporting cells and lie beneath a thick cuticle (Keil and

\*Present address: Institut für Zoologie/Biologie 1, Universität Regensburg, Universitätsstraße 31, D-8400 Regensburg, Germany.

Key words: insect olfaction, olfactory transduction, primary insect cell culture, second messengers, cation channels, G-proteins,  $\text{InsP}_3$ , protein kinase C.

Steinbrecht, 1987; Keil, 1989), they are relatively inaccessible for intracellular or patch-clamp recordings. Therefore, a primary cell culture system consisting of differentiating, immunocytochemically identifiable ORNs from third-stage pupae of male *M. sexta* was developed (Stengl and Hildebrand, 1990). Within 2–3 weeks in culture, the ORNs differentiate morphologically and physiologically. They express at least three different potassium channels and a tetrodotoxin (TTX)-blockable sodium channel, but no voltage-gated  $\text{Ca}^{2+}$  channels (Zufall *et al.* 1991c). They respond to their species-specific sex pheromone blend by opening nonspecific cation channels (Stengl *et al.* 1989, 1992a,b). These pheromone-dependent cation channels do not discriminate between  $\text{Na}^+$  and  $\text{K}^+$ . Their current reverses around 0mV, irrespective of the main external anion, and shows pronounced inward rectification with external  $\text{Ca}^{2+}$  buffered to  $10^{-7} \text{ mol l}^{-1}$  (Stengl *et al.* 1992b). These cation channels were the only channels observed in cultured ORNs to carry inward currents at potentials more negative than the resting potential, with ‘normal’ ionic gradients (see Materials and methods). Previous evidence has suggested that the pheromone-dependent cation channels were second-messenger-dependent (Stengl *et al.* 1992b).

After exposure to pheromone, cells of insect antennae exhibit slow and long-lasting increases in cyclic GMP concentration (Ziegelberger *et al.* 1990) and antennal extracts show G-protein-dependent rapid and transient increases in inositol 1,4,5-trisphosphate ( $\text{InsP}_3$ ) concentration (Boekhoff *et al.* 1990; Breer *et al.* 1988, 1990). Hence, it was postulated that a G-protein-dependent phosphoinositidase C generating the two second messengers  $\text{InsP}_3$  and diacylglycerol (Berridge, 1987; Gilman, 1987; Berridge and Irvine, 1989) was involved in the generation of the rising phase of the receptor potential, while a guanylate cyclase and probably a protein kinase C (Boekhoff and Breer, 1992) might be involved in its declining phase and in the adaptation of the receptor potentials (Stengl *et al.* 1992a).

This study investigates whether cultured ORNs respond to activation by G-proteins, application of  $\text{InsP}_3$ , a rise in internal  $\text{Ca}^{2+}$  concentration or activation by a protein kinase C by opening cation channels that might play an important role in pheromone transduction.

## Materials and methods

### *Animals*

The moths *Manduca sexta* (Lepidoptera: Sphingidae), reared from eggs on an artificial diet (modified from that of Bell and Joachim, 1976), were kept on a long-day photoperiod regimen (17h:7h light:dark, with lights on at 07:00h) at 25–26°C and 50–60% relative humidity. Pupae were staged as previously described (Sanes and Hildebrand, 1976a; Tolbert *et al.* 1983). They were usually selected for dissection between 08:00 and 10:00 h and anesthetized by chilling on ice for 10–15min before dissection of the antennal flagellum.

### *Cell cultures*

Unless otherwise specified, all culture media were purchased from GIBCO (Grand

Island, NY) and all chemicals and biochemicals, from Sigma Chemical Co. (St Louis, MO).

Details of the culture techniques have been reported previously (Stengl and Hildebrand, 1990). Briefly, antennal flagella from male *M. sexta* pupae (stage 3 of the 18 stages of pupal development) were disrupted by a combination of mechanical and enzymatic treatment. The dissociated cells were plated on concanavalin-A-coated coverslips or uncoated Falcon plastic dishes, in Leibowitz (L15) medium, supplemented with 5% fetal bovine serum (Hyclone) and conditioned medium (supernatant fluid from cultures of a non-neuronal *M. sexta* cell line, generously provided by Drs J. Hayashi and L. Oland). The cultures were maintained in an incubator for 2–4 weeks at about 20°C and high humidity.

#### *Patch-clamp technique and data analysis*

Patch-clamp experiments followed the method described by Hamill *et al.* (1981). Patch pipettes were made from borosilicate glass capillaries (Clark Electromedical Instruments, Reading, UK) with a Sutter Instruments micropipette puller (model P80/PC). The pipettes were coated with Sylgard (Dow Corning, Midland, MI). The tip resistance was 5–20 M $\Omega$  when the electrodes were filled with physiological saline. The cells were viewed at 400 $\times$  magnification with an Olympus inverted microscope equipped with phase contrast or Hoffmann modulation contrast optics. After formation of a seal between the pipette and the cell membrane, the electrode capacitance was compensated.

Whole-cell currents were measured at room temperature with an Axopatch 1C patch-clamp amplifier (Axon Instruments Co., Burlingame, CA). The currents were acquired on-line with an 80386-based microcomputer (Dell Computer Corp., Austin, TX) using pClamp software (Axon Instruments Co.), which was also used for data analysis. Leakage currents were generally not subtracted since they remained negligible. Only in a few cells (as indicated in the figure legends), where Cs<sup>+</sup>, TTX and Ni<sup>2+</sup> did not block all the voltage-dependent currents, were leakage currents subtracted. Junction potential drifts (usually around 10 pA, as determined by the amplifier) that occurred during some recordings were subtracted with pClamp software. For current–voltage plots, currents were generally measured at least 5 ms after the start of the voltage pulse and during the current plateau.

#### *Solutions and stimulus application*

During whole-cell recordings, cultured ORNs were kept in ‘extracellular saline solution’ containing (in mmol l<sup>-1</sup>): 156 NaCl, 4 KCl, 6 CaCl<sub>2</sub>, 5 glucose and 10 Hepes (adjusted to pH 7.1 with NaOH). For determination of the ion-specificity of the cation channels, Na<sup>+</sup> was replaced by 156 mmol l<sup>-1</sup> KCl or CsCl; Cl<sup>-</sup> was replaced by acetate or aspartate. During examination of the Ca<sup>2+</sup> dependence and Ca<sup>2+</sup> permeability of the cation channels, the cells were bathed in 160 mmol l<sup>-1</sup> CsCl, 10 mmol l<sup>-1</sup> Hepes, 5 mmol l<sup>-1</sup> glucose, containing 20 mmol l<sup>-1</sup>, 5 mmol l<sup>-1</sup> or 10<sup>-7</sup> mol l<sup>-1</sup> free Ca<sup>2+</sup> (11 mmol l<sup>-1</sup> EGTA and 1 mmol l<sup>-1</sup> Ca<sup>2+</sup>). To block Ca<sup>2+</sup> channels, 6 mmol l<sup>-1</sup> NiCl<sub>2</sub> was added in most experiments. In all experiments, the voltage-dependent Na<sup>+</sup> channels were blocked with 10<sup>-8</sup> mol l<sup>-1</sup> external TTX and the delayed rectifier K<sup>+</sup> channels were

blocked with  $160\text{mmol l}^{-1}$  internal  $\text{Cs}^+$ , while the  $\text{Ca}^{2+}$ -dependent  $\text{K}^+$  channels could not be blocked by  $\text{Cs}^+$  or any other blocker tested.

The 'intracellular saline solution' used to fill pipettes was (in  $\text{mmol l}^{-1}$ ): 150 KCl, 5 NaCl, 1  $\text{CaCl}_2$ , 11 EGTA, 1.5  $\text{MgCl}_2$ , 10 Hepes. For most whole-cell recordings (and all recordings illustrated) KCl and NaCl were replaced by 160 CsCl and  $\text{MgCl}_2$  was omitted. To examine the  $\text{Ca}^{2+}$  dependence of the cation channels, intracellular solutions were used with  $\text{Ca}^{2+}$  concentrations of  $10^{-6}$ ,  $10^{-7}$ ,  $10^{-8}\text{mol l}^{-1}$  or of less than  $10^{-8}\text{mol l}^{-1}$  buffered with BAPTA (Calbiochem, La Jolla CA):  $1\text{mmol l}^{-1}$  BAPTA,  $0.9\text{mmol l}^{-1}$   $\text{CaCl}_2$  (pCa=6);  $1\text{mmol l}^{-1}$  BAPTA,  $0.5\text{mmol l}^{-1}$   $\text{CaCl}_2$  (pCa=7);  $1\text{mmol l}^{-1}$  BAPTA,  $0.09\text{mmol l}^{-1}$   $\text{CaCl}_2$  (pCa=8); or  $2\text{mmol l}^{-1}$  BAPTA,  $0.09\text{mmol l}^{-1}$   $\text{CaCl}_2$  (pCa<8).

'Normal' ionic gradients were defined as high [NaCl] externally and high [KCl] internally. The bath solution contained (in  $\text{mmol l}^{-1}$ ): 156 NaCl, 4 KCl, 6  $\text{CaCl}_2$ , 5 glucose and 10 Hepes (adjusted to pH7.1 with NaOH) outside. The solutions in the pipette contained (in  $\text{mmol l}^{-1}$ ): 156 KCl, 5 NaCl, 1  $\text{CaCl}_2$ , 11 EGTA (pCa=7), 10 Hepes. For almost all recordings (and for all recordings illustrated), KCl and NaCl were replaced by  $160\text{mmol l}^{-1}$  CsCl.

Before breaking into the whole-cell configuration, the patches were kept at 0mV pipette potential while phorbol esters (TPA, phorbol 12-myristate 13-acetate), or protein kinase C inhibitors such as staurosporine (Boehringer Mannheim, Indianapolis, IN) or H7, were applied to the cell *via* a glass pipette (tip opening about  $10\ \mu\text{m}$ ) which was driven by a Picospritzer (General Valve Corp., Fairfield, NJ). All other agents were included in the patch pipette filling solutions, but only in the shaft; the tip of the electrode was filled with about equal parts of the intracellular control solution. Therefore, the concentrations of the agents used are more dilute (to a maximum of 50%) than indicated.

## Results

After 2–3 weeks *in vitro*, ORNs originating from pupal antennae of 3-day-old *M. sexta* males were examined for the presence of intracellular-messenger-gated cation currents. In whole-cell patch-clamp recordings with  $160\text{mmol l}^{-1}$  CsCl,  $10^{-7}\text{mol l}^{-1}$   $\text{CaCl}_2$  in the patch pipette, and  $10^{-8}\text{mol l}^{-1}$  tetrodotoxin (TTX) outside (to block all the voltage-dependent  $\text{Na}^+$  and  $\text{K}^+$  channels), no cation currents were elicited ( $N=21$ ) at potentials between  $-120\text{mV}$  and  $70\text{mV}$  (Fig. 1). This was independent of the principal cation ( $\text{Na}^+$ ,  $\text{K}^+$  or  $\text{Cs}^+$ ), the principal anion ( $\text{Cl}^-$ , acetate or aspartate) and the external  $\text{Ca}^{2+}$  concentration. The mean  $\pm$  S.D. of inward currents elicited at  $-120\text{mV}$  was  $-4.8\pm 12.2\text{pA}$  ( $N=21$ ). Extracellular  $\text{Ni}^+$  was added in most recordings to block presumptive  $\text{Ca}^{2+}$  channels.

Experiments designed to identify intracellular-messenger-dependent cation channels with properties similar to the pheromone-dependent cation channels (Fig. 2, and Stengl *et al.* 1992b) sought channels that (a) carry inward currents at potentials more negative than the resting potential, with currents less than  $-25\text{pA}$  at  $-110\text{mV}$  (exceeding the mean leak currents by about five times) under 'normal' ionic gradients; (b) show approximately the same reversal potentials (around 0mV) in various extracellular solutions with different principal cations, irrespective of the main anion outside; (c) show

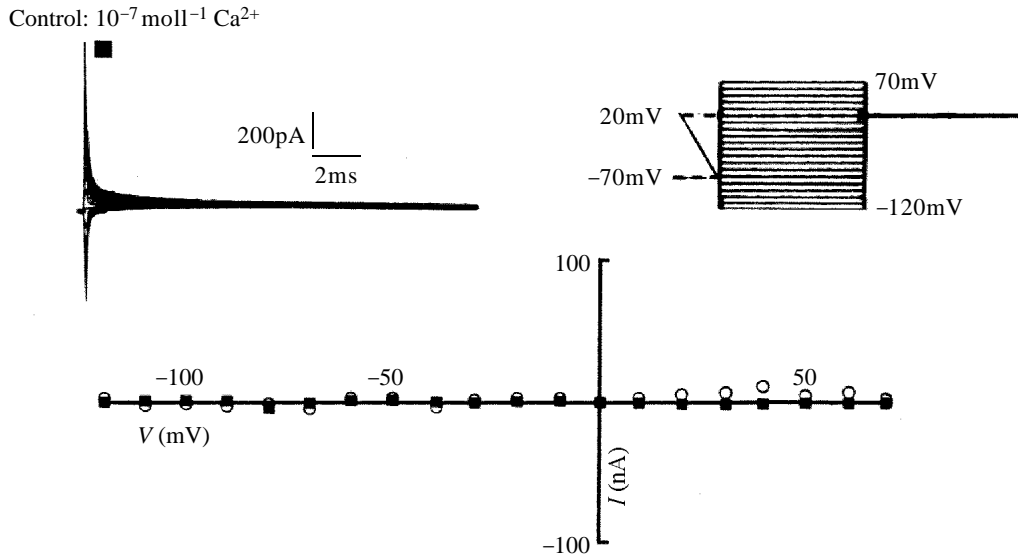

Fig. 1. Responses of cultured ORNs under control conditions. Current traces (upper left, in sodium acetate), voltage protocol (upper right) and current–voltage plot of whole-cell patch-clamp recordings from 3-week cultured ORN from *M. sexta*. Under control conditions, with  $160\text{mmol l}^{-1}$  CsCl and  $10^{-7}\text{mol l}^{-1}$   $\text{Ca}^{2+}$  in the patch pipette and  $10^{-8}\text{mol l}^{-1}$  tetrodotoxin (TTX) outside, no currents except leakage currents were elicited. This was observed regardless of the different main cations or anions ( $156\text{mmol l}^{-1}$  KCl, open circles,  $156\text{mmol l}^{-1}$  sodium acetate, filled squares) or of the  $\text{Ca}^{2+}$  concentrations outside; in this case it was  $10^{-7}\text{mol l}^{-1}$ . For all current–voltage plots shown the current was measured at least 5 ms after the start of the voltage steps, during the current plateau. From a holding potential of 20 mV a voltage ramp was applied to  $-70\text{mV}$  (for software reasons only), then the cell was kept at different potentials from  $-120\text{mV}$  to  $70\text{mV}$  in 10 mV steps.

inward rectification with  $10^{-7}\text{mol l}^{-1}$   $\text{Ca}^{2+}$  outside (Stengl *et al.* 1992b), but linear  $I/V$  characteristics with  $6\text{mmol l}^{-1}$  external  $\text{Ca}^{2+}$  (Fig. 2); and (d) may be blockable by tetraethylammonium ( $\text{TEA}^+$ ) (Stengl *et al.* 1992b). Criterion b was not always a reliable indication of the presence of intracellular-messenger-dependent cation currents since, in some cells,  $\text{Ca}^{2+}$ -dependent  $\text{K}^+$  currents, which were unaffected by any blocker tested, were superimposed on  $\text{TEA}^+$ -blockable cation currents.

For all cells tested, currents at potentials between at least  $-100\text{mV}$  and  $+70\text{mV}$  were determined in steps of 10 or 20 mV in different extracellular solutions, at various holding potentials. For all recordings shown,  $160\text{mmol l}^{-1}$  CsCl and  $10^{-8}\text{mol l}^{-1}$  TTX were present to block the voltage-dependent  $\text{K}^+$  and  $\text{Na}^+$  channels. The ORNs were recorded on-line with a microcomputer, which also generated the voltage protocols (see Fig. 1). This procedure allowed quick determination of the reversal potentials and the rectification properties of the currents in different extracellular salines. It did not allow measurement of the exact time course or the exact maximal amplitude of transient currents, because the data were usually not collected as a continuous time record, but were recorded at different times after obtaining the whole-cell configuration. Leakage

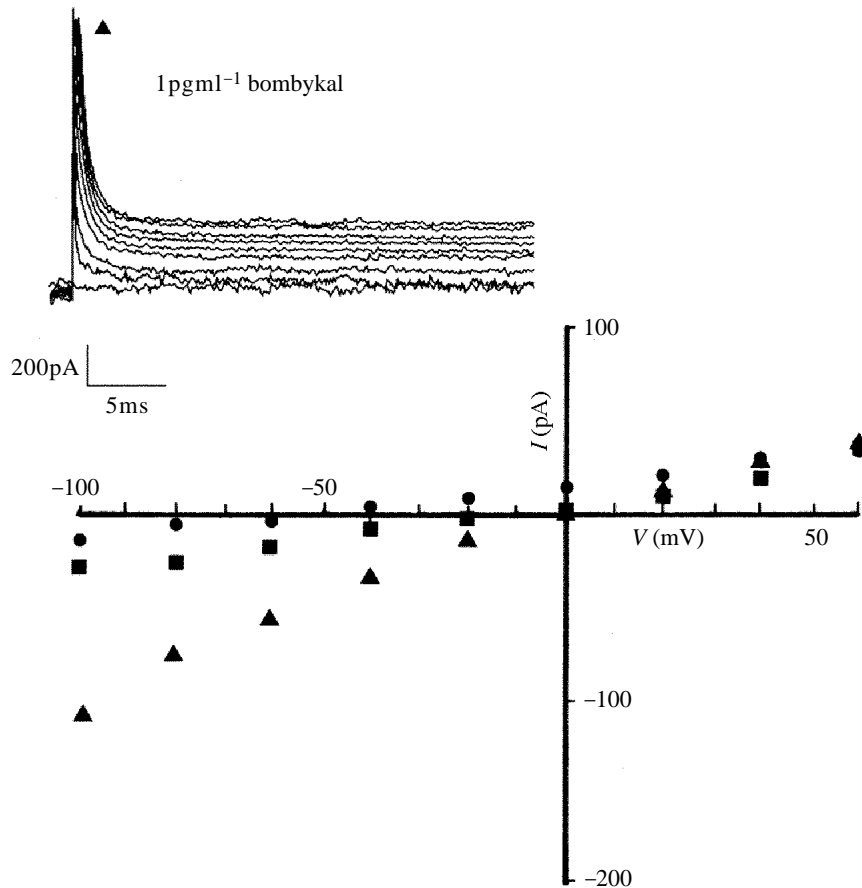

Fig. 2. Responses of cultured ORNs to their species-specific sex pheromone in  $6\text{mmol l}^{-1}$  external  $\text{Ca}^{2+}$ . After application of  $1\text{pg ml}^{-1}$  bombykal to 3- to 5-week cultured ORNs, pheromone-dependent currents with a reversal potential around  $0\text{mV}$  were elicited. The pheromone-dependent current declined within 3s to a lower, more stable level in extracellular saline containing  $6\text{mmol l}^{-1}$   $\text{Ca}^{2+}$  and  $156\text{mmol l}^{-1}$   $\text{NaCl}$ . Although the pheromone-dependent currents are inwardly rectifying in  $10^{-7}\text{mol l}^{-1}$  external  $\text{Ca}^{2+}$  (Stengl *et al.* 1992b), they are linear in  $6\text{mmol l}^{-1}$  external  $\text{Ca}^{2+}$ , mainly because of a decrease in inward current at negative potentials. The holding potential was  $-80\text{mV}$ . After a step from  $-80\text{mV}$  to  $-100\text{mV}$ , the cell potential was changed in 20-mV steps from  $-100$  to  $60\text{mV}$ . Filled circles mark the current-voltage plot of a whole-cell patch-clamp recording 30s before application of the pheromone. The filled triangles mark the current-voltage plot during bombykal application, after subtraction of the previous control recording (filled circles) taken 3s before the pheromone response. The current recording during pheromone application without leakage-subtraction is marked with a filled triangle in the upper left corner. Filled squares indicate the leakage-subtracted current-voltage plot about 4s after the pheromone application. In this recording, as well as in all following recordings shown,  $160\text{mmol l}^{-1}$   $\text{CsCl}$  and  $10^{-8}\text{mol l}^{-1}$   $\text{TTX}$  are present to block voltage-dependent  $\text{K}^{+}$  and  $\text{Na}^{+}$  channels.

currents were generally not subtracted in the following experiments, since they remained negligible in control recordings (Fig. 1).

To test whether activation of G-proteins elicits cation currents with the same properties as the pheromone-dependent cation currents (Fig. 2, and Stengl *et al.* 1992b), agents that influence G-protein activation were included in the patch pipette during whole-cell recordings.

With  $10\ \mu\text{mol l}^{-1}$  to  $1\text{ mmol l}^{-1}$  GTP $\gamma$ S (a non-hydrolysable GTP-analog; Dunlap *et al.* 1987) in the shaft of the patch pipette (without ATP present), 25% (2/8) of the analyzed ORNs displayed currents greater than  $-25\text{ pA}$  at  $-110\text{ mV}$ . With  $10\ \mu\text{mol l}^{-1}$  to  $1\text{ mmol l}^{-1}$  GTP $\gamma$ S+ATP ( $10\ \mu\text{mol l}^{-1}$  to  $5\text{ mmol l}^{-1}$ ), the number of responding cells increased, so that 75% (9/12) of all ORNs tested displayed currents greater than  $-25\text{ pA}$  at  $-110\text{ mV}$  (Figs 3, 4A–C), even with  $6\text{ mmol l}^{-1}$  NiCl<sub>2</sub> outside ( $N=3$ ). The reversal potential of the GTP $\gamma$ S and the GTP $\gamma$ S+ATP-dependent currents remained around  $0\text{ mV}$  if the main cation outside was Na<sup>+</sup>, K<sup>+</sup> or Cs<sup>+</sup>, regardless of whether Cl<sup>-</sup> or acetate was the anion (Fig. 3). The currents showed inward rectification with  $10^{-7}\text{ mol l}^{-1}$  Ca<sup>2+</sup> outside (Fig. 3). GTP $\gamma$ S-dependent cation currents (with or without ATP) were blocked with  $20\text{ mmol l}^{-1}$  TEA<sup>+</sup> in the extracellular solution ( $N=4$ ). Perfusion with  $1\text{ mmol l}^{-1}$  GDP $\beta$ S (a non-hydrolysable GDP analog) did not invoke any currents that differed from leakage currents ( $N=4$ ).

With  $100\ \mu\text{mol l}^{-1}$  to  $5\text{ mmol l}^{-1}$  ATP added to the pipette solution, 44% of the ORNs tested displayed nonspecific cation currents ( $N=22$ ) in the absence of external Ni<sup>2+</sup> (not shown). Thus, ATP alone can elicit cation currents with the same properties as the GTP $\gamma$ S-dependent currents, either directly, or indirectly, in cultured ORNs.

When GTP $\gamma$ S-dependent currents, as well as ATP-dependent currents or GTP $\gamma$ S+ATP-dependent currents, were recorded consecutively in the same cell, a significant dependence of the current amplitude on external [Ca<sup>2+</sup>] became obvious (Fig. 4A–C) when the bath solution was changed from  $10^{-7}\text{ mol l}^{-1}$  Ca<sup>2+</sup> to  $6\text{ mmol l}^{-1}$  Ca<sup>2+</sup>. Irrespective of the monovalent cations present (see Fig. 3), the inward current at a constant negative potential increased transiently and reached a stationary lower current level within less than 2s (Fig. 4B,C). In  $10^{-7}\text{ mol l}^{-1}$  extracellular Ca<sup>2+</sup> (Figs 3, 4A), the elicited cation currents appeared to be more stable and showed inward rectification. The non-linear *I/V* curve became linear after several seconds in  $6\text{ mmol l}^{-1}$  Ca<sup>2+</sup> outside (Fig. 4C).

Quantification of the amplitudes of the GTP $\gamma$ S-dependent currents was difficult and dose–response curves could not be obtained reliably since the currents contained a transient component that was not always detected on the non-continuous time record used. A detailed analysis of the kinetics of the currents will be provided elsewhere. The current amplitudes observed at  $-110\text{ mV}$  (measured at least 5ms after the start of the voltage pulse, during the current plateau) ranged from  $-37\pm 17\text{ pA}$  (mean  $\pm$  s.d.) in  $6\text{ mmol l}^{-1}$  Ca<sup>2+</sup> outside to  $-86\pm 35\text{ pA}$  in  $10^{-7}\text{ mol l}^{-1}$  Ca<sup>2+</sup>, both with  $10\ \mu\text{mol l}^{-1}$  GTP $\gamma$ S ( $N=6$ ), and from  $-36\pm 18\text{ pA}$  in high [Ca<sup>2+</sup>] to  $-210\pm 96\text{ pA}$  in low [Ca<sup>2+</sup>], both with  $1\text{ mmol l}^{-1}$  GTP $\gamma$ S ( $N=5$ ).

The possibility that a G-protein-dependent activation of phosphoinositidase C might have caused opening of these GTP $\gamma$ S-dependent cation channels, as suggested by

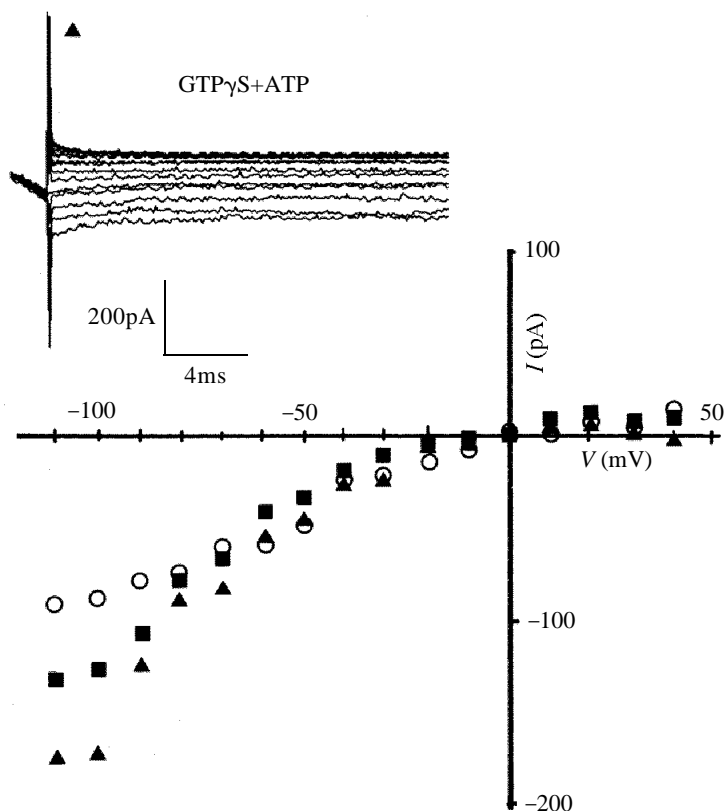

Fig. 3. GTP $\gamma$ S+ATP-dependent cation currents. With  $1\text{mmol l}^{-1}$  GTP $\gamma$ S+ATP included in the patch pipette, cation currents are elicited that reverse around  $0\text{mV}$ , irrespective of the main extracellular cations. They are inwardly rectifying in  $10^{-7}\text{mol l}^{-1}$  extracellular  $\text{Ca}^{2+}$ . Current traces in  $156\text{mmol l}^{-1}$  CsCl are shown in the upper left corner. Current-voltage plots from a 3-week cultured ORN in different extracellular salines containing  $10^{-7}\text{mol l}^{-1}$   $\text{Ca}^{2+}$  and  $156\text{mmol l}^{-1}$  CsCl (filled triangles), KCl (open circles) or sodium acetate (filled squares) are shown. The consecutive recordings in  $156\text{mmol l}^{-1}$  NaCl and CsCl are separated by about 3 s (taken from the same cell); the recording in KCl is taken from a different cell. Voltage protocol as described in Fig. 1.

biochemical evidence (Breer *et al.* 1990), was considered. The cultured ORNs were stimulated with inositol 1,4,5-trisphosphate (Ins $P_3$ ). If Ins $P_3$  ( $0.01\text{--}100\ \mu\text{mol l}^{-1}$  and no ATP) was included in the patch pipette during the whole-cell recordings, cation currents were larger than  $-25\text{pA}$  at  $-110\text{mV}$  in 77% (30/39) of all recordings, even in the presence of external  $\text{Ni}^{2+}$  (Fig. 5). These cation currents also reversed around  $0\text{mV}$ . The reversal potential was independent of the principal external cation, and the external anions (Fig. 5). If TEA $^+$  was added extracellularly (Fig. 6), no currents were elicited in ORNs with Ins $P_3$  in the patch pipette, regardless of the extracellular solutions used ( $N=14$ ).

The amplitude and  $I/V$  relationship of the Ins $P_3$ -dependent currents were also



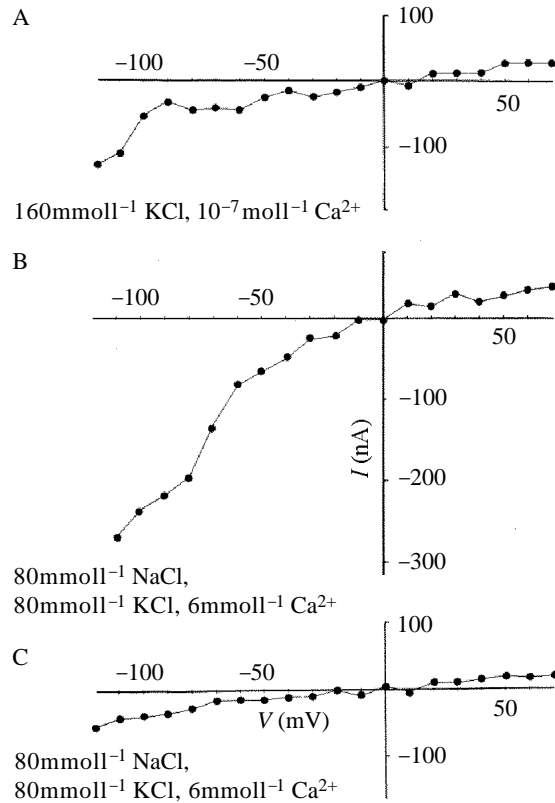

Fig. 4. (A–C). The amplitude of GTP $\gamma$ S+ATP-dependent currents depends on extracellular [ $\text{Ca}^{2+}$ ]. Current–voltage plots of three consecutive measurements (separated by about 3s) from the same cell in different extracellular solutions. After increasing the extracellular  $\text{Ca}^{2+}$  concentration, the agent-dependent currents increase transiently (B), before declining to a lower, more stable level (C) (irrespective of the monovalent cations present, as shown in Fig. 3). Voltage protocol as described in Fig. 1. The patch pipette contained  $1\text{mmol l}^{-1}$  GTP $\gamma$ S,  $1\text{mmol l}^{-1}$  ATP,  $10^{-7}\text{mol l}^{-1}$   $\text{Ca}^{2+}$  and  $160\text{mmol l}^{-1}$  CsCl.

dependent on extracellular [ $\text{Ca}^{2+}$ ], in a strikingly similar manner to the GTP $\gamma$ S-dependent currents (Fig. 4). The  $\text{InsP}_3$ -dependent currents at  $-110\text{mV}$  ranged from  $-26\pm 12\text{pA}$  (mean  $\pm$  S.D.) in  $6\text{mmol l}^{-1}$   $\text{Ca}^{2+}$  outside to  $-122\pm 119\text{pA}$  in  $10^{-7}\text{mol l}^{-1}$   $\text{Ca}^{2+}$  outside, both with  $1\mu\text{mol l}^{-1}$   $\text{InsP}_3$  ( $N=5$ ) and from  $-21\pm 12\text{pA}$  in  $6\text{mmol l}^{-1}$   $\text{Ca}^{2+}$  to  $-212\pm 126\text{pA}$  in  $10^{-7}\text{mol l}^{-1}$   $\text{Ca}^{2+}$ , both with  $100\mu\text{mol l}^{-1}$   $\text{InsP}_3$  ( $N=6$ ).

To determine whether  $\text{InsP}_3$  opens cation channels *via* an increase in internal  $\text{Ca}^{2+}$  concentration, agents known to change the  $\text{Ca}^{2+}$  levels were included in the patch pipette solution. With  $\text{Ca}^{2+}$  inside buffered to less than  $10^{-8}\text{mol l}^{-1}$  ( $2\text{mmol l}^{-1}$  BAPTA+ $0.09\text{mmol l}^{-1}$   $\text{CaCl}_2$ ) during perfusion with  $\text{InsP}_3$ , only 22% (2/9) of the recorded ORNs displayed cation currents. After increasing the  $\text{Ca}^{2+}$  concentration in the patch pipette solution to  $10^{-6}\text{mol l}^{-1}$  (BAPTA-buffered, without any addition of other intracellular messengers), cation currents with the characteristics of the  $\text{InsP}_3$ - and

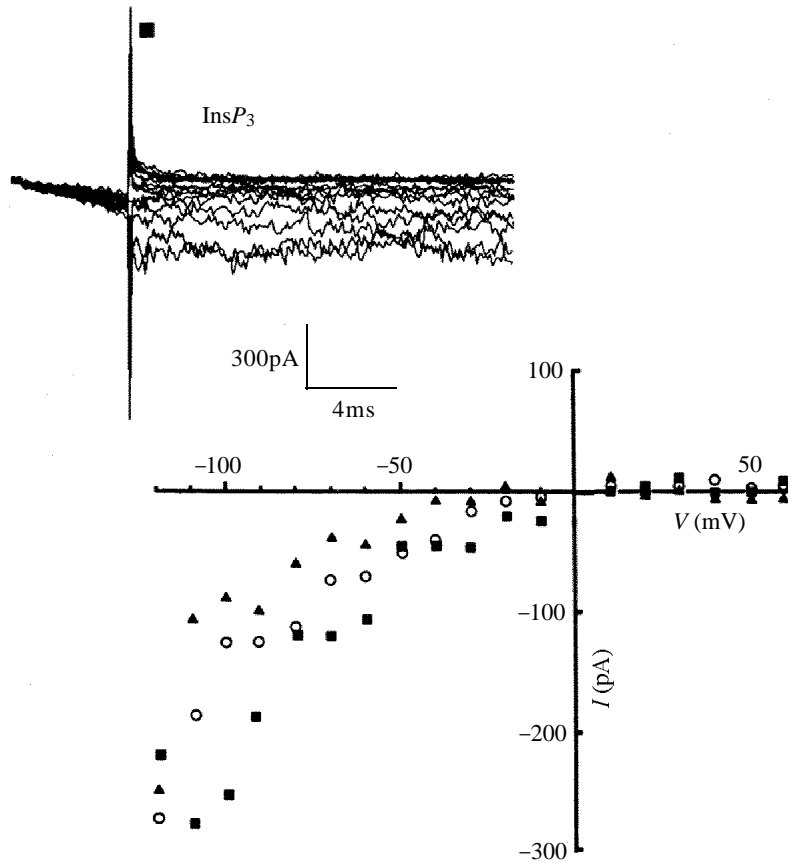

Fig. 5. With  $100 \mu\text{mol l}^{-1}$   $\text{InsP}_3$  included in the shaft of the patch pipette, cation currents are elicited which reverse around  $0\text{mV}$ , irrespective of the extracellular monovalent cations present. They are inwardly rectifying with buffered  $\text{Ca}^{2+}$  outside. Current traces in extracellular solution containing sodium acetate as the main cation are shown in the upper left corner. The current–voltage plot shows three consecutive recordings (separated by at least 3s) from the same cell in different extracellular solutions:  $156\text{mmol l}^{-1}$  CsCl, filled triangles;  $156\text{mmol l}^{-1}$  KCl, open circles; and  $156\text{mmol l}^{-1}$  sodium acetate, filled squares. Voltage protocol as described in Fig. 1.

GTP $\gamma$ S-dependent currents appeared in 85% (11/13) of the cells tested (Figs 7–9). The  $\text{Ca}^{2+}$ -dependent currents at  $-110\text{mV}$  ranged from  $-148 \pm 120\text{pA}$  (mean  $\pm$  s.d.) in  $6\text{mmol l}^{-1}$   $\text{Ca}^{2+}$  outside ( $N=9$ ) to  $-141 \pm 136\text{pA}$  in  $10^{-7}\text{mol l}^{-1}$   $\text{Ca}^{2+}$  outside ( $N=13$ ). Again, these  $\text{Ca}^{2+}$ -dependent cation currents reversed around  $0\text{mV}$ , irrespective of the main anion or cation outside (Fig. 7), were  $\text{TEA}^+$ -blockable and depended on the extracellular  $\text{Ca}^{2+}$  concentration (Figs 7–9). Switching from low  $[\text{Ca}^{2+}]$  outside to  $6\text{mmol l}^{-1}$   $\text{Ca}^{2+}$  transiently increased the  $\text{Ca}^{2+}$ -activated current (Fig. 8B,C), which then reached a more stable lower current level with a linear  $I/V$  relationship (Figs 8C, 9A). The transient current increase was not observed in all recordings (compare Figs 8A–C, 9A).

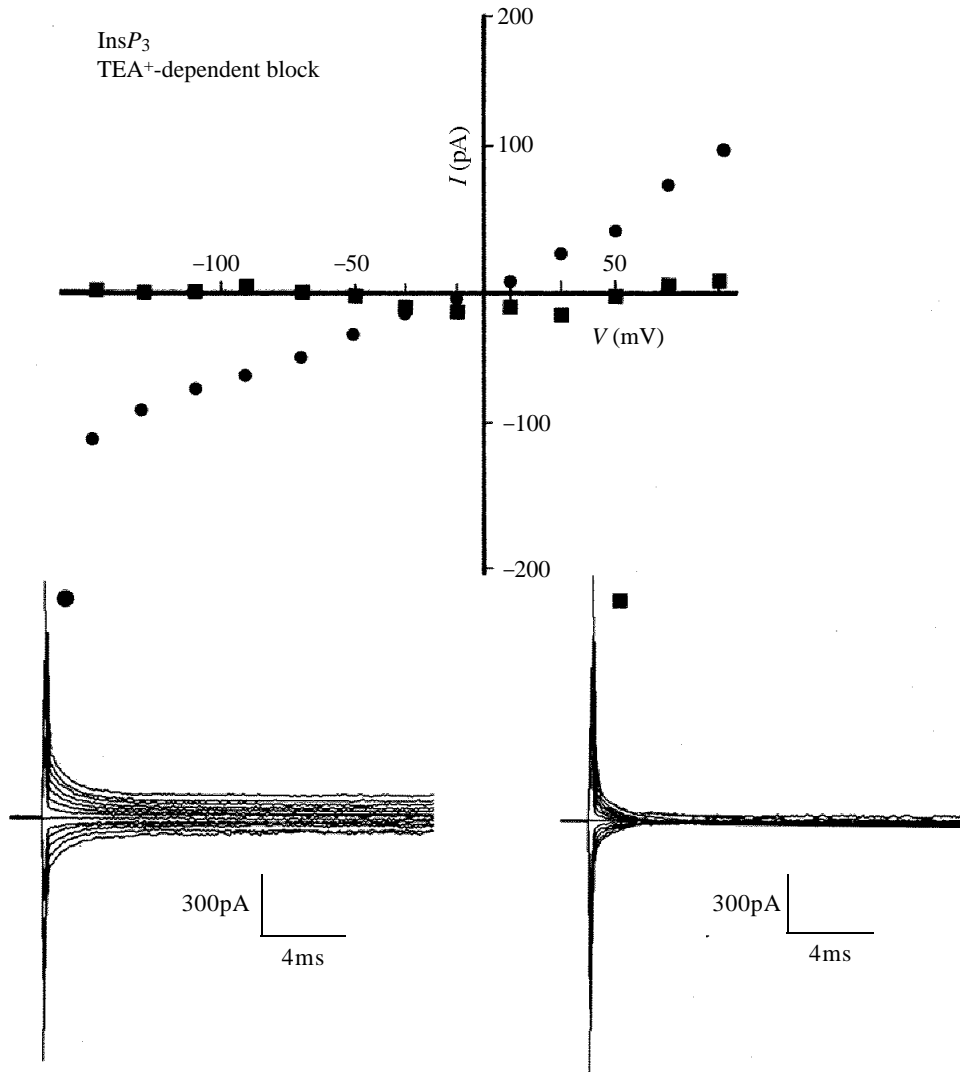

Fig. 6. With  $100 \mu\text{mol l}^{-1}$  InsP<sub>3</sub> in the patch pipette, TEA<sup>+</sup>-blockable cation currents were elicited. The current-voltage plot shows two consecutive recordings from the same cell (separated by about 6s) in extracellular saline containing  $156 \text{mmol l}^{-1}$  NaCl, no added Ca<sup>2+</sup> (which corresponds to at least  $2 \mu\text{mol l}^{-1}$  Ca<sup>2+</sup>) and  $6 \text{mmol l}^{-1}$  NiCl<sub>2</sub>. After the first recording (filled circles),  $20 \text{mmol l}^{-1}$  TEA<sup>+</sup> was applied extracellularly. All cation currents were blocked (filled squares). The current protocols before (filled circles) and after TEA<sup>+</sup>-application (filled squares) are shown below. Holding potential was  $-50 \text{mV}$ .

After switching from  $6 \text{mmol l}^{-1}$  Ca<sup>2+</sup> outside to  $10^{-7} \text{mol l}^{-1}$  Ca<sup>2+</sup>, the inward currents increased and became inwardly rectifying (Figs 7, 9A). Switching back to  $6 \text{mmol l}^{-1}$  external Ca<sup>2+</sup>, the inward currents increased temporarily to a higher current amplitude (Fig. 8B), before declining again and becoming linear (Figs 8C, 9A). Maximal shifts of

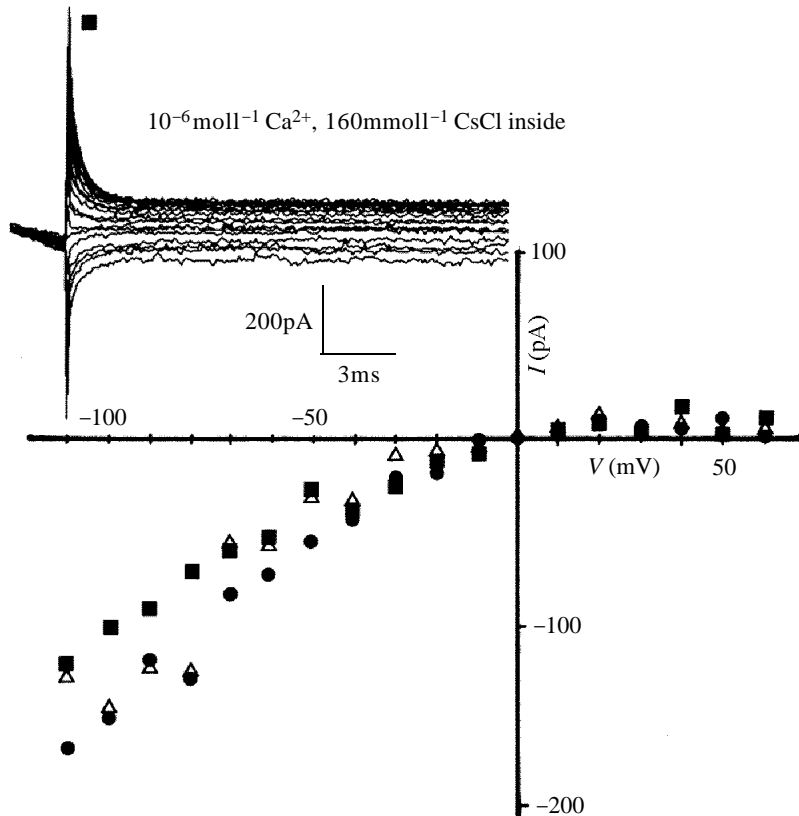

Fig. 7. With  $160\text{mmol l}^{-1}$  CsCl and  $10^{-6}\text{mol l}^{-1}$   $\text{Ca}^{2+}$  in the patch pipette,  $\text{Ca}^{2+}$ -dependent cation currents are elicited that reverse around  $0\text{mV}$  in different extracellular solutions containing  $156\text{mmol l}^{-1}$  sodium acetate (filled squares),  $\text{SrCl}_2$  (open triangles) or potassium acetate (filled circles). The recordings in sodium acetate and  $\text{SrCl}_2$  are taken from the same ORN (separated by about  $6\text{s}$ ), while the recording in potassium acetate is from another cell. With  $10^{-7}\text{mol l}^{-1}$   $\text{Ca}^{2+}$  outside, the currents are inwardly rectifying. Voltage protocol as described in Fig. 1.

about  $12\text{mV}$  to more positive values in the reversal potential of the  $\text{Ca}^{2+}$ -dependent cation currents were observed when the extracellular  $\text{Ca}^{2+}$  concentrations were changed from  $6\text{mmol l}^{-1}$  to  $10^{-7}\text{mol l}^{-1}$  (=buffered  $\text{Ca}^{2+}$ ) in symmetrical CsCl solutions (Fig. 9B). The mean  $\pm$  s.d. of the reversal potential shortly after changing the extracellular  $\text{Ca}^{2+}$  concentration was  $-7.7\pm 4.2\text{mV}$  in high  $[\text{Ca}^{2+}]$  outside ( $N=12$ ) and  $-0.3\pm 1.5\text{mV}$  in buffered  $\text{Ca}^{2+}$  outside ( $N=18$ ).

Finally, the possibility that  $\text{Ca}^{2+}$  also opens cation channels in cultured ORNs indirectly *via* activation of a protein kinase C (PKC) was investigated. In 52% of the ORNs tested ( $N=44$ ), cation currents with a reversal potential around  $0\text{mV}$  were elicited when  $10\text{pgml}^{-1}$  phorbol ester (TPA=PKC activator) was applied to the cell *via* a micropipette before obtaining the whole-cell configuration or with TPA in the patch pipette (Figs 10, 11A,B). In contrast to the  $\text{InsP}_3$ -,  $\text{GTP}\gamma\text{S}$ - or  $\text{Ca}^{2+}$ -dependent currents,

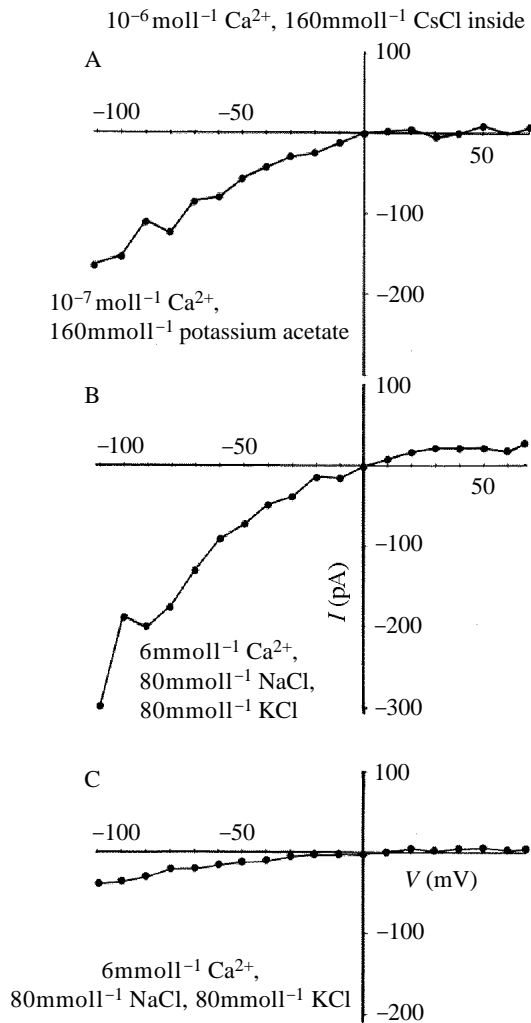

Fig. 8. (A–C). Ca<sup>2+</sup>-dependent cation currents in 3-week cultured ORNs depend on extracellular [Ca<sup>2+</sup>]. Current–voltage plots of three consecutive measurements (separated by at least 3 s) of the same ORN. After increasing the extracellular Ca<sup>2+</sup> concentration (irrespective of the monovalent cations present), currents increased transiently (B), before declining within a few seconds to a lower, more stable level (C). Voltage protocol as described in Fig. 1. The patch pipette contained 160 mmol l<sup>-1</sup> CsCl and 10<sup>-6</sup> mol l<sup>-1</sup> Ca<sup>2+</sup> and 10<sup>-8</sup> mol l<sup>-1</sup> extracellular TTX was present (as in all other recordings).

the TPA-evoked currents were not dependent on extracellular [Ca<sup>2+</sup>] (Fig. 11A,B), since they did not show inward rectification in 10<sup>-7</sup> mol l<sup>-1</sup> external Ca<sup>2+</sup>. The PKC-dependent cation currents were blocked with 20 mmol l<sup>-1</sup> extracellular TEA<sup>+</sup> (*N*=3) (Fig. 10). At -110 mV, the PKC-dependent currents ranged from -45±16 pA in 6 mmol l<sup>-1</sup> Ca<sup>2+</sup> (*N*=6) to -64±34 pA in buffered Ca<sup>2+</sup> (*N*=3).

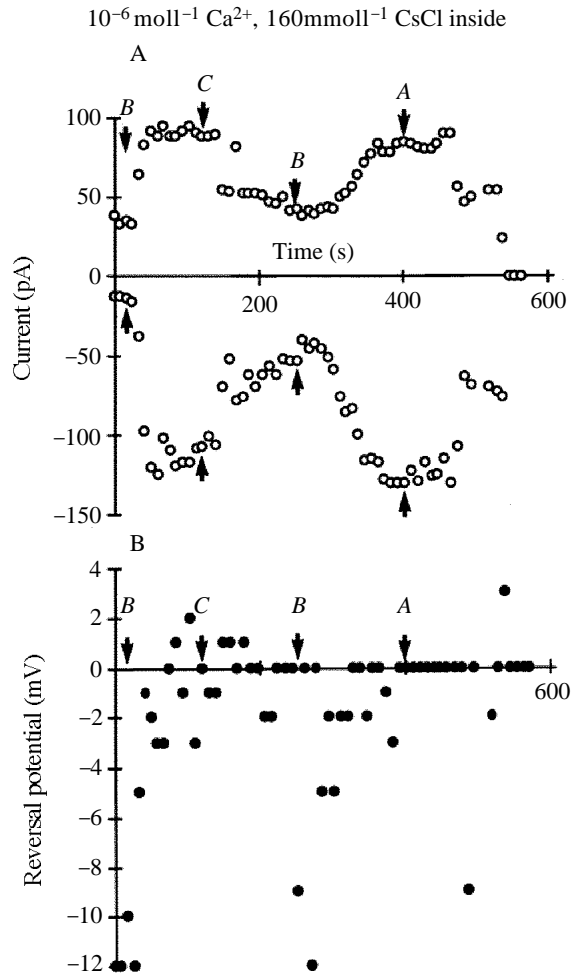

Fig. 9. Calcium-dependent cation currents depend on extracellular  $\text{Ca}^{2+}$  concentration. With high  $[\text{Ca}^{2+}]$  outside, they decline within a few seconds to a lower level. (A,B) A 20-day cultured ORN was recorded in symmetrical  $160 \text{ mmol l}^{-1} \text{ CsCl}$  solutions and  $10^{-6} \text{ mol l}^{-1} \text{ CaCl}_2$  in the patch pipette. After keeping the cells in  $6 \text{ mmol l}^{-1}$  external  $\text{Ca}^{2+}$ , the  $\text{Ca}^{2+}$  concentrations in the extracellular solutions were exchanged (arrows) from  $6 \text{ mmol l}^{-1} \text{ CaCl}_2$  (solution A) to  $10^{-7} \text{ mol l}^{-1} \text{ CaCl}_2$  (solution B), and to  $20 \text{ mmol l}^{-1} \text{ CaCl}_2$  (solution C). (A) The inward currents at  $-100 \text{ mV}$  (below), as well as the outward currents at  $+100 \text{ mV}$  (above) are shown over time (A). The first current–voltage protocol taken after the break from the cell-attached configuration to the whole-cell configuration (in solution A) was recorded at time zero. Shifts in the reversal potential occur during changes in extracellular  $\text{Ca}^{2+}$  concentrations (B).

To test whether the  $\text{InsP}_3$ -dependent currents were also elicited from a  $\text{Ca}^{2+}$ -dependent phosphorylation *via* a PKC, PKC inhibitors were applied (Figs 12, 13). With  $10 \mu\text{mol l}^{-1}$  H7 or  $2 \mu\text{mol l}^{-1}$  staurosporine applied with  $10 \mu\text{mol l}^{-1}$   $\text{InsP}_3$ , 50% (4/8) of the ORNs tested displayed transient cation currents (Fig. 12). The other 50% did not respond. These

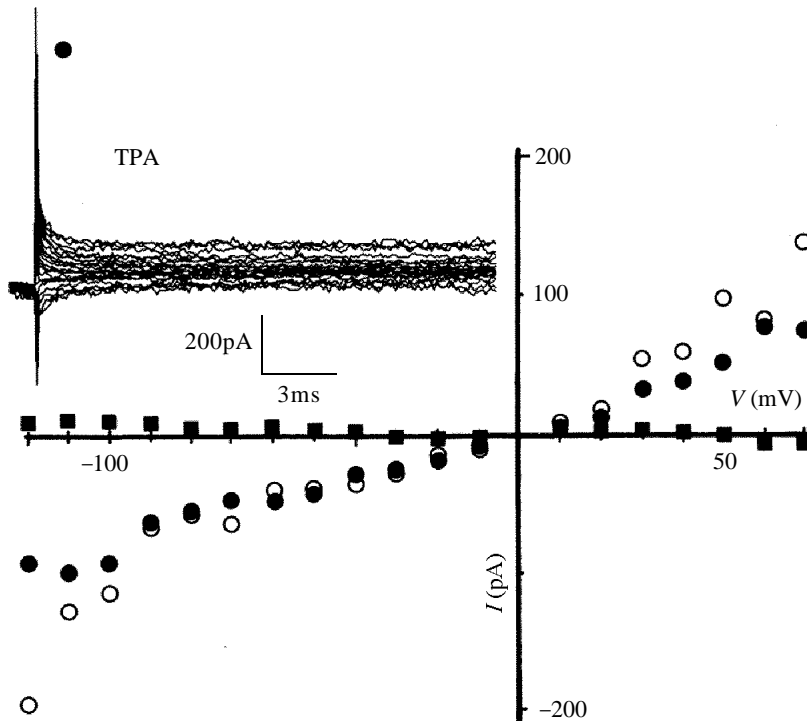

Fig. 10. Phorbol-ester-dependent currents reverse around 0mV and are stable in  $6\text{mmol l}^{-1}$   $\text{Ca}^{2+}$  outside. In contrast to the  $\text{Ca}^{2+}$ -dependent currents (Fig. 8B,C), the phorbol-ester-dependent currents do not decline within a few seconds to a lower current plateau in salines with  $6\text{mmol l}^{-1}$   $\text{Ca}^{2+}$  outside. Two consecutive recordings (filled circles show the first recording) separated by about 3s were taken from the same cell, after application of  $10\text{ng ml}^{-1}$  TPA via a picospritzer-driven glass capillary. After application of  $20\text{mmol l}^{-1}$   $\text{TEA}^+$ , TPA-dependent currents are blocked (filled squares).

transient cation currents were elicited only during the first voltage protocol (Fig. 12). In comparison, 77% (30/39) of the ORNs tested expressed more-stable currents without the addition of PKC inhibitors (Fig. 13), as did the TPA-dependent currents (Fig. 10).

### Discussion

The development of a primary cell culture system of differentiating, identifiable ORNs from *M. sexta* antennae has greatly facilitated studies of the physiological properties of olfactory neurons (Stengl and Hildebrand, 1990). Biochemical evidence indicates the involvement of second messengers in pheromone transduction in these olfactory neurons (Ziegelberger *et al.* 1990; Breer *et al.* 1990). Furthermore, cultured ORNs respond to pheromonal stimulation by opening of nonspecific cation channels that appear not to be directly gated by the pheromone. Therefore, the possible occurrence of cation channels mediated by an intracellular messenger was sought.

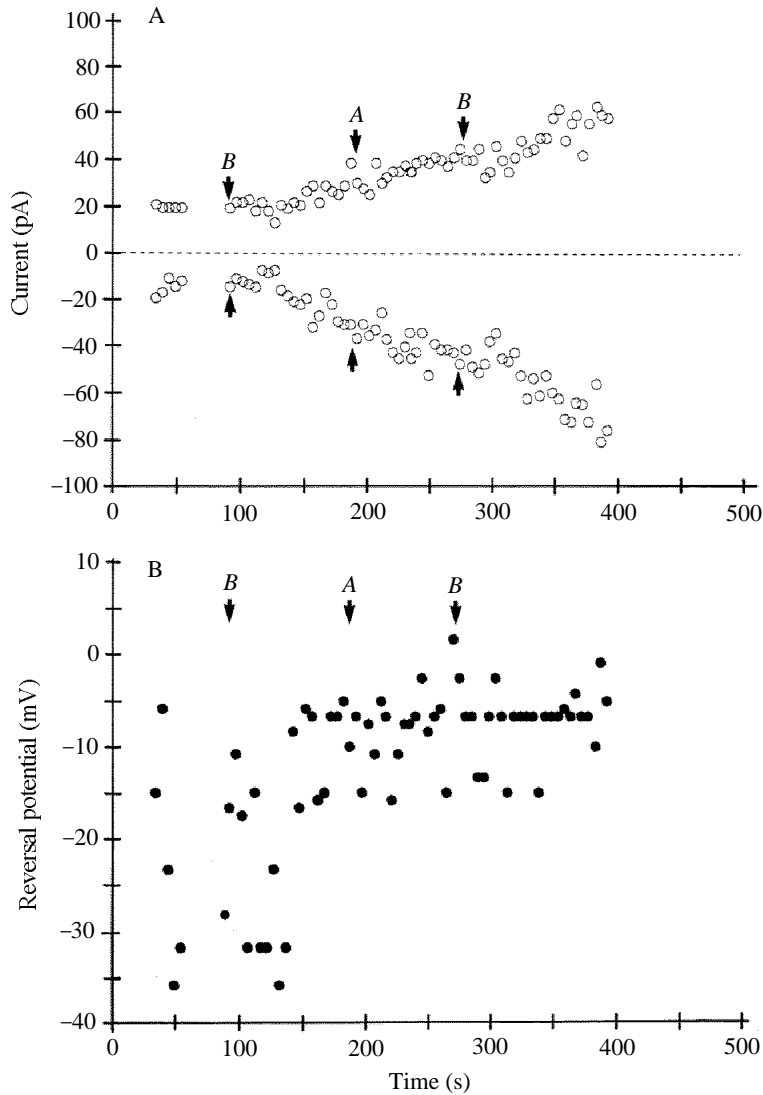

Fig. 11. Protein-kinase-C-dependent cation currents do not depend on extracellular  $\text{Ca}^{2+}$  concentration. After 21 days, the cultured ORN was recorded in the whole-cell patch-clamp mode, in symmetrical CsCl solutions ( $160\text{mmol l}^{-1}$  CsCl inside and outside) with  $10^{-7}\text{mol l}^{-1}$   $\text{Ca}^{2+}$ ,  $10\text{nmol l}^{-1}$  TPA (phorbol ester) and  $250\text{ }\mu\text{mol l}^{-1}$  ATP in the patch pipette. Voltage protocols as described in Fig. 1. (A) Inward currents at  $-100\text{mV}$  (below) and outward currents at  $+100\text{mV}$  (above). (B) Reversal potentials. At the arrows, the extracellular  $\text{Ca}^{2+}$  concentration was changed from  $20\text{mmol l}^{-1}$  (A) to  $10^{-7}\text{mol l}^{-1}$  (B).

Whole-cell patch-clamp recordings from the soma of 3-week cultured ORNs showed that  $\text{GTP}\gamma\text{S}$ , ATP,  $\text{InsP}_3$ ,  $10^{-6}\text{mol l}^{-1}$   $\text{Ca}^{2+}$  and PKC cause inward currents of at least  $-25\text{pA}$  at  $-110\text{mV}$ , irrespective of the principal monovalent cation or anion outside the cell. Previous experiments have shown that ORNs from antennae of male *M. sexta*



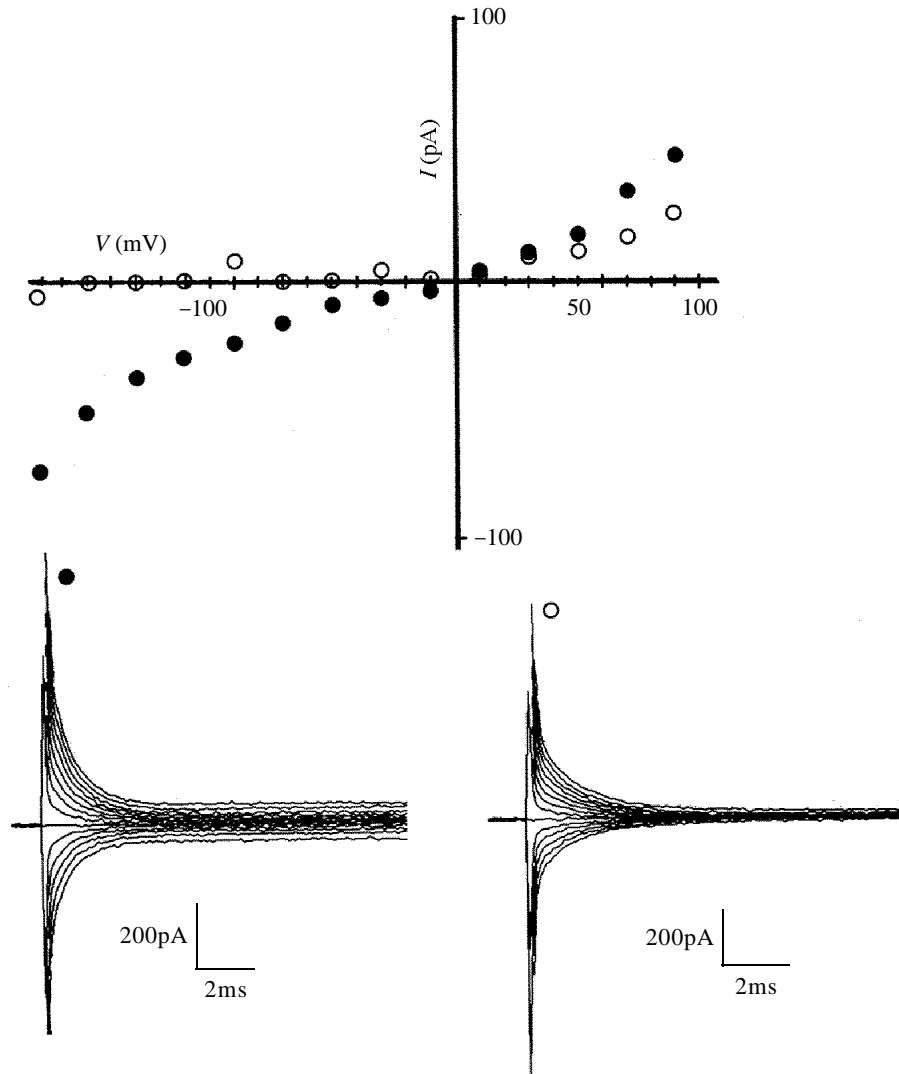

Fig. 12. Application of H7 renders  $\text{InsP}_3$ -dependent currents more transient. With  $10 \mu\text{mol l}^{-1}$   $\text{InsP}_3$  and  $10 \mu\text{mol l}^{-1}$  H7 in the patch pipette and extracellular saline containing  $156 \text{ mmol l}^{-1}$  NaCl,  $6 \text{ mmol l}^{-1}$   $\text{NiCl}_2$  and no added  $\text{Ca}^{2+}$  (corresponding to at least  $2 \mu\text{mol l}^{-1}$  external  $\text{Ca}^{2+}$ ),  $\text{InsP}_3$ -dependent currents decline to zero within less than 3s. The current-voltage plots of two consecutive recordings (filled circles show the first recording) from the same cultured ORN are shown. Voltage protocol as described in Fig. 1 with a holding potential of  $-70 \text{ mV}$ . Current traces are shown below.

respond to their sex pheromone *in vitro* with the opening of cation channels that are distinguished from other channels by inward currents at potentials more negative than the resting potential. They have a reversal potential around  $0 \text{ mV}$ , irrespective of the principal external cation or anions, promote linear currents in  $6 \text{ mmol l}^{-1}$  external  $\text{Ca}^{2+}$  (Fig. 2) and express inward rectification in  $10^{-7} \text{ mol l}^{-1}$  external  $\text{Ca}^{2+}$  (Stengl *et al.* 1992b).

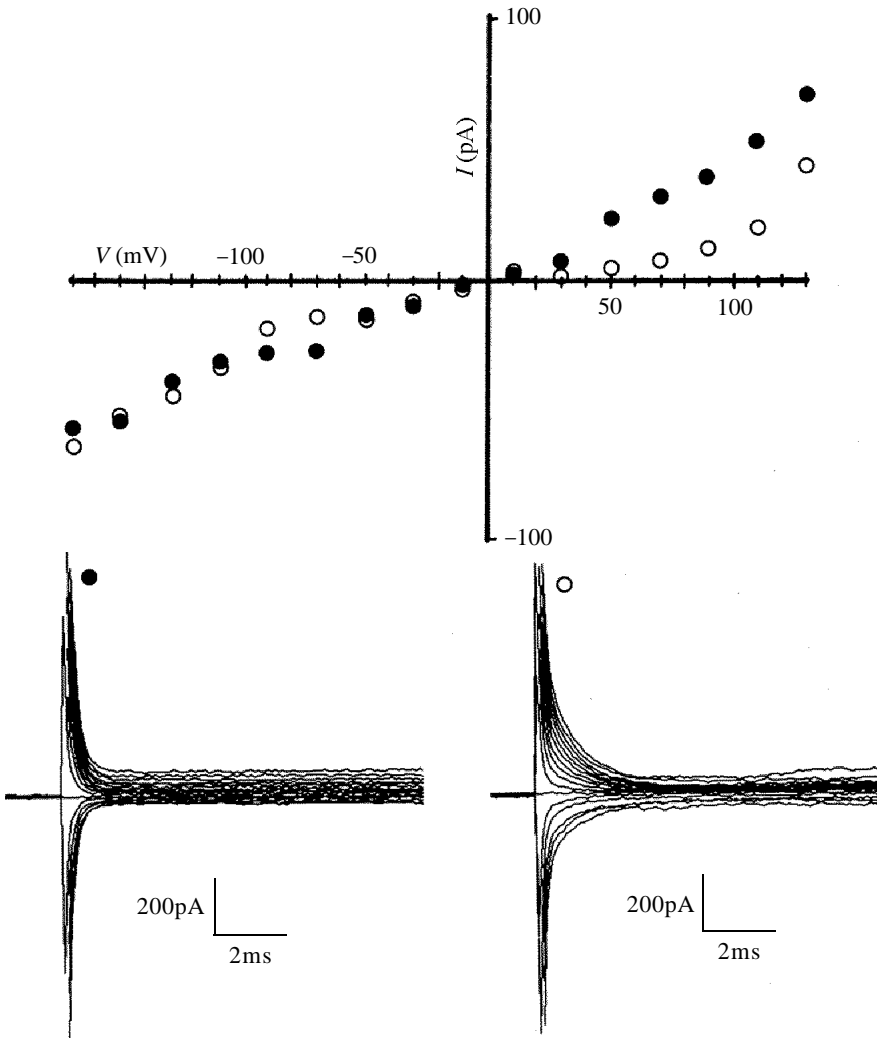

Fig. 13.  $\text{InsP}_3$ -dependent currents are more stable without the addition of H7. Current-voltage plots of two consecutive recordings (filled circles show the first recording) from the same cultured ORN. With  $10 \mu\text{mol l}^{-1}$   $\text{InsP}_3$  in the patch pipette and extracellular saline containing  $156 \text{mmol l}^{-1}$  NaCl,  $6 \text{mmol l}^{-1}$   $\text{NiCl}_2$  and no added  $\text{Ca}^{2+}$ ,  $\text{InsP}_3$ -dependent currents are stable over several seconds. With several micromolar external free  $\text{Ca}^{2+}$ , the currents are almost linear and develop inward rectification 3 s later in the consecutive recording of the same cell. Voltage protocol as described in Fig. 1 with a holding potential of  $-70 \text{mV}$ . Current traces are shown below.

The percentage of pheromone-sensitive cells observed *in vitro* (38%) (Stengl *et al.* 1992b) correlates well with the percentage of pheromone-sensitive cells in the antenna, which is about 32% (Lee and Strausfeld, 1990). Because more than 70% of the cultured ORNs responded to intracellular messenger application, it is assumed that ORNs sensitive to plant odors as well as those sensitive to pheromone contain cation channels

that are mediated by intracellular messengers. Considering the transient nature of at least some of these channels, they may be present in most, or perhaps all, ORNs. But since at least 2s is required to generate the first computer-driven voltage protocol after breaking into the whole-cell configuration, they might have been overlooked. Furthermore, since these agent-dependent currents possibly depend on intracellular organelles and molecules (such as intracellular  $\text{Ca}^{2+}$  stores), fast washout of the intracellular medium could obliterate the intracellular-messenger-dependent currents. Finally, the presence of intracellular  $\text{Ca}^{2+}$  buffers could decrease the agent-dependent cation currents in some of the cells to below the levels of leakage currents.

Currents elicited by  $\text{GTP}\gamma\text{S}$ , ATP,  $\text{InsP}_3$  and  $10^{-6} \text{ mol l}^{-1} \text{ Ca}^{2+}$  had similar properties and could be blocked by reducing the intracellular  $\text{Ca}^{2+}$  concentration to less than  $10^{-8} \text{ mol l}^{-1}$  with BAPTA. Therefore, it is likely that  $\text{InsP}_3$ ,  $\text{GTP}\gamma\text{S}$  and ATP might act *via* an increase in internal  $\text{Ca}^{2+}$  concentration, possibly *via* activation of a G-protein-dependent phosphoinositidase C (Berridge, 1987; Ferris and Snyder, 1992; Gilman, 1987; Stengl *et al.* 1992a). This has been suggested by biochemical experiments with antennal extracts (Boeckhoff *et al.* 1990; Breer *et al.* 1990). It is assumed that  $\text{InsP}_3$  might produce a rise in internal  $\text{Ca}^{2+}$  concentration by promoting  $\text{Ca}^{2+}$  influx from outside (Restrepo *et al.* 1990) and/or *via* release from internal stores, as has been reported in many other systems (Berridge and Irvine, 1989). A release of  $\text{Ca}^{2+}$  from internal stores in the soma (Berridge and Irvine, 1989) seems likely, since cation channels opened after perfusion with  $\text{InsP}_3$  in the presence of external  $\text{Ca}^{2+}$  channel blockers.

Direct activation of at least a subpopulation of the intracellular-messenger-dependent cation channels by a rise in internal  $[\text{Ca}^{2+}]$  seems probable, since  $10^{-6} \text{ mol l}^{-1} \text{ Ca}^{2+}$  elicits cation currents, even in the presence of PKC blockers. Similarly, the 'spontaneous' opening of cation channels after patch excision (McClintock and Ache, 1990; Stengl *et al.* 1992b) in solutions containing a high  $\text{Ca}^{2+}$  concentration could be explained by  $\text{Ca}^{2+}$ -dependent activation of cation channels. The theory of cation channels directly dependent on  $[\text{Ca}^{2+}]$  is supported by *in situ* recordings from extruded dendrites of ORNs of the moth *Antheraea polyphemus* (Zufall *et al.* 1991b). Calcium-dependent cation channels have also been reported in vertebrate ORNs (Schild and Bischofberger, 1991) and in cultured lobster ORNs sustained inward currents were reported after  $\text{InsP}_3$  application (Fadool *et al.* 1991).

The intracellular-messenger-dependent cation channels of cultured ORNs appear to be permeable to  $\text{Ca}^{2+}$ , since a switch to extracellular solutions containing a high ( $6\text{--}20 \text{ mmol l}^{-1}$ )  $\text{Ca}^{2+}$  concentration moved the reversal potentials of the cation currents to more positive values and transiently increased the amplitude of the currents. It is assumed that the influx of extracellular  $\text{Ca}^{2+}$  through the cation channels causes activation of more  $\text{Ca}^{2+}$ -dependent cation channels, which are later closed (in a  $\text{Ca}^{2+}$ -dependent manner) *via* an unknown mechanism. The  $\text{Ca}^{2+}$ -dependent rapid inactivation of cation channels, also found in vertebrate ORNs (Zufall *et al.* 1991a), could constitute a mechanism for rapid termination of the physiological response to odor stimulation. This rapid inactivation has been postulated for pheromone transduction by Kaissling (1972). The transient opening of channels might also underlie the on-responses of ORNs that can follow odor pulses.

It is likely that the rise in internal  $[Ca^{2+}]$  also activates  $Ca^{2+}$ -dependent kinases (Nishizuka, 1984). This assumption is supported by the finding that the addition of kinase blockers decreases the number of cells in which intracellular-messenger-dependent cation currents are observed. Furthermore, cation channels in cultured ORNs were opened *via* stimulation by a protein kinase C. Since the PKC-dependent currents were more stable and were not dependent on extracellular  $Ca^{2+}$  concentration (they remained linear at all  $Ca^{2+}$  concentrations tested), they might represent a channel population different from the  $GTP\gamma S$ -, ATP-,  $InsP_3$ - and  $Ca^{2+}$ -dependent cation currents. As an alternative hypothesis, the transient, directly  $Ca^{2+}$ -dependent cation channels might change their  $Ca^{2+}$ -dependence (activation as well as blockage) after PKC-dependent phosphorylation (Ewald *et al.* 1985). This assumption is supported by the observation that the addition of PKC blockers appeared to render  $InsP_3$ -dependent currents more transient and that all agent-dependent currents could be blocked by  $TEA^+$ . Single-channel experiments will distinguish between the two hypotheses.

Since PKC-dependent and  $Ca^{2+}$ -dependent cation channels have been observed in excised patches from extruded dendrites of ORNs of the moth *A. polyphemus*, the cation currents probably play an important role in olfactory transduction (Zufall and Hatt, 1991; Zufall *et al.* 1991b). Despite the assumption of Zufall *et al.* (1991b) that  $Ca^{2+}$ -dependent cation channels occur only in inner dendrites, it appears more likely that both channel types occur in outer dendrites. The inner dendritic segment and the soma of the ORNs are tightly wrapped by an auxiliary cell, forming a compartment separate from the outer dendritic segment, which extends uncovered beyond the cuticle into the hairshaft (Keil and Steinbrecht, 1987). The inner dendritic membranes are, therefore, not easily accessible, and extruded dendritic vesicles probably consist of outer dendritic membranes, even when the antennal shank is completely shaved off (Keil and Steinbrecht, 1987; Zufall and Hatt, 1991; Zufall *et al.* 1991b). Because the *in situ* recordings from extruded dendrites of ORNs in *A. polyphemus* were undertaken with  $2\text{ mmol l}^{-1}$   $Ca^{2+}$  outside, and because the dendrites were preincubated with the pheromone up to an hour before recording (Zufall and Hatt, 1991), transient ion channels would not be detected. Therefore, whether transiently activated cation channels and directly  $Ca^{2+}$ -dependent cation channels also occur on outer dendrites has yet to be determined. Since all the channels found so far on dendrites of ORNs are either directly or indirectly  $Ca^{2+}$ -dependent, it has yet to be shown whether and how internal  $[Ca^{2+}]$  increases in the outer dendrite. So far, no intracellular  $Ca^{2+}$  stores have been identified in the outer dendrite (Keil and Steinbrecht, 1987; Keil, 1989). In recent experiments, a transient  $Ni^{2+}$ -blockable  $Ca^{2+}$  current, followed by cation currents, was observed after intracellular messenger application (Stengl *et al.* 1991). We are therefore investigating whether pheromone triggers the transient opening of both  $InsP_3$ -dependent and PKC-dependent  $Ca^{2+}$  channels in cultured ORNs.

This work was made possible by the generous support of Drs J. G. Hildebrand and R. B. Levine (University of Arizona, Tucson, USA), in whose laboratories in Tucson these experiments were carried out. I also thank Dr F. Gruber, Dr I. Kuhlmann and Dr W. Rathmayer for providing space and equipment in Konstanz, where this work was

completed. I am very grateful to Drs C. Erxleben, U. Homberg, H.-A. Kolb, R. B. Levine, W. Rathmayer and Ms M. Cahill for greatly improving the manuscript. I thank Karim Fuad for help with two figures, Dr L. Oland for generous help with the cell cultures and Dr Oland and Dr J. Hayashi for the supply of conditioned medium. This research was supported by a grant from the DFG [STE 531] and in part by NIH grant AI-23253 to J. G. Hildebrand.

### References

- BELL, R. A. AND JOACHIM, F. A. (1976). Techniques for rearing laboratory colonies of tobacco hornworms and pink bollworms. *Ann. ent. Soc. Am.* **69**, 365–373.
- BERRIDGE, M. J. (1987). Inositol trisphosphate and diacylglycerol: two interacting second messengers. *A. Rev. Biochem.* **56**, 159–193.
- BERRIDGE, M. J. AND IRVINE, R. F. (1989). Inositol phosphates and cell signalling. *Nature* **341**, 197–205.
- BOEKHOFF, I. AND BREER, H. (1992). Termination of second messenger signaling in olfaction. *Proc. natn. Acad. Sci. U.S.A.* **89**, 471–474.
- BOEKHOFF, I., STROTMANN, J., RAMING, K., TAREILUS, E. AND BREER, H. (1990). Odorant-sensitive phospholipase C in insect antennae. *Cell. Sign.* **2**, 49–56.
- BREER, H., BOEKHOFF, I. AND TAREILUS, E. (1990). Rapid kinetics of second messenger formation in olfactory transduction. *Nature* **345**, 65–68.
- BREER, H., RAMING, K. AND BOEKHOFF, I. (1988). G-proteins in the antennae of insects. *Naturwissenschaften* **75**, 627.
- CHRISTENSEN, T. A., HILDEBRAND, J. G., TUMLINSON, J. H. AND DOOLITTLE, R. E. (1989). Sex pheromone blend of *Manduca sexta*: Responses of central olfactory interneurons to antennal stimulation in male moths. *Archs Insect Biochem. Physiol.* **10**, 281–291.
- DUNLAP, K., HOLZ, G. G. AND RANE, S. G. (1987). G proteins as regulators of ion channel function. *Trend Neurosci.* **10**, 241–244.
- EWALD, D. A., WILLIAMS, A. AND LEVITAN, I. B. (1985). Modulation of single Ca<sup>2+</sup>-dependent K<sup>+</sup>-channel activity by protein phosphorylation. *Nature* **315**, 503–506.
- FADDOOL, A., MICHEL, W. C. AND ACHE, B. W. (1991). G-proteins and inositol-phospholipid metabolism implicated in odor response of cultured lobster olfactory neurons. *Chemical Senses* **16**, 518–519.
- FERRIS, C. D. AND SNYDER, S. (1992). Inositol phosphate receptors and calcium disposition in the brain. *J. Neurosci.* **12**, 1567–1574.
- GILMAN, A. G. (1987). G proteins: transducers of receptor-generated signals. *A. Rev. Biochem.* **56**, 15–49.
- HAMILL, O. P., MARTY, A., NEHER, E., SAKMANN, B. AND SIGWORTH, F. J. (1981). Improved patch-clamp techniques for high resolution current recordings from cells and cell free membrane patches. *Pflügers Arch.* **391**, 85–100.
- KAISLING, K.-E. (1972). Kinetic studies of transduction in olfactory receptors of *Bombyx mori*. In *International Symposium on Olfaction and Taste IV* (ed. D. Schneider), pp. 207–213. Stuttgart: Wiss Verlagsges.
- KAISLING, K.-E. (1987). *R.H. Wright Lectures on Insect Olfaction* (ed. K. Colbow), pp. 1–75. Burnaby, BC, Canada: Simon Fraser University.
- KAISLING, K.-E., HILDEBRAND, J. G. AND TUMLINSON, J. H. (1989). Pheromone receptor cells in the male moth *Manduca sexta*. *Archs Insect Biochem. Physiol.* **10**, 273–279.
- KAISLING, K.-E. AND THORSON, J. (1980). Insect olfactory sensilla: structural, chemical and electrical aspects of the functional organization. In *Receptors for Neurotransmitters, Hormones and Pheromones in Insects* (ed. D. B. Sattelle, L. M. Hall and J. G. Hildebrand), pp. 261–282. Amsterdam: North-Holland Elsevier.
- KAISLING, K.-E., ZACK-STRAUSFELD, C. AND RUMBO, E. (1987). Adaptation processes in insect olfactory receptors: Mechanisms and behavioral significance. In *Olfaction and Taste IX*, vol. 510 (ed. S. D. Roper and J. Atema), pp. 104–112. Ann. N.Y. Acad. Sci.
- KEIL, T. A. (1989). Fine structure of the pheromone-sensitive sensilla on the antenna of the hawkmoth, *Manduca sexta*. *Tissue & Cell* **21**, 139–151.

- KEIL, T. A. AND STEINBRECHT, A. (1987). Mechanosensitive and olfactory sensilla of insects. In *Insect Ultrastructure* (ed. R. C. King and H. Akai), pp. 477–516. New York: Plenum.
- LEE, J. K. AND STRAUSFELD, N. J. (1990). Structure, distribution and number of surface sensilla and their receptor cells on the antennal flagellum of the male sphinx moth *Manduca sexta*. *J. Neurocytol.* **19**, 519–538.
- MCCLINTOCK, T. S. AND ACHE, B. (1990). Nonselective cation channel activated by patch excision from lobster olfactory receptor neurons. *J. Membr. Biol.* **113**, 115–122.
- NISHIZUKA, Y. (1984). The role of protein kinase C in cell surface signal transduction and tumour promotion. *Nature* **308**, 693–697.
- RESTREPO, D., MIYAMOTO, T., BRYANT, B. P. AND TEETER, J. H. (1990). Odor stimuli trigger influx of calcium into olfactory neurons of the channel catfish. *Science* **249**, 1166–1168.
- SANES, J. R. AND HILDEBRAND, J. G. (1976a). Structure and development of antennae in a moth, *Manduca sexta*. *Devl Biol.* **51**, 282–299.
- SANES, J. R. AND HILDEBRAND, J. G. (1976b). Origin and morphogenesis of sensory neurons in an insect antenna. *Devl Biol.* **51**, 300–319.
- SCHILD, D. AND BISCHOFBERGER, J. (1991). Ca<sup>2+</sup> modulates an unspecific cation conductance in olfactory cilia of *Xenopus laevis*. *Expl Brain Res.* **84**, 187–194.
- SCHNEIDER, D. (1962). Electrophysiological investigation of insect olfaction. In *Olfaction and Taste* (ed. I. Y. Zottermann), pp. 85–103. Oxford: Pergamon.
- SCHNEIDER, D. AND BOECKH, J. (1962). Rezeptorpotential und Nervimpulse einzelner olfaktorischer Sensillen der Insektenantenne. *Z. vergl. Physiol.* **45**, 405–412.
- SCHWEITZER, E. S., SANES, J. R. AND HILDEBRAND, J. G. (1976). Ontogeny of electroantennogram responses in the moth *Manduca sexta*. *J. Insect Physiol.* **22**, 955–960.
- STARRATT, A. N., DAHM, K. H., ALLEN, N., HILDEBRAND, J. G., PAYNE, T. L. AND RÖLLER, H. (1979). Bombykal, a sex pheromone of the sphinx moth *Manduca sexta*. *Z. Naturforsch.* **34**, 9–12.
- STENGL, M., HATT, H. AND BREER, H. (1992a). Peripheral processes in insect olfaction. *A. Rev. Physiol.* **54**, 665–681.
- STENGL, M. AND HILDEBRAND, J. G. (1990). Insect olfactory receptor neurons *in vitro*: morphological and immunocytochemical characterization of male specific-antennal receptor cells from developing antennae of male *Manduca sexta*. *J. Neurosci.* **10**, 837–847.
- STENGL, M., LEVINE, R. B. AND HILDEBRAND, J. G. (1991). Olfactory receptor neurons of the male moth *Manduca sexta* express second messenger modulated ion channels *in vitro*. *Soc. Neurosci. Abstr.* **17**, 1102.
- STENGL, M., ZUFALL, F., HATT, H., DUDEL, J. AND HILDEBRAND, J. G. (1989). Patch clamp analysis of male *Manduca sexta* olfactory receptor neurons in primary cell culture. *Soc. Neurosci. Abstr.* **15**, 751.
- STENGL, M., ZUFALL, F., HATT, H. AND HILDEBRAND, J. G. (1992b). Olfactory receptor neurons from antennae of developing male *Manduca sexta* respond to components of the species-specific sex pheromone *in vitro*. *J. Neurosci.* **12**, 2523–2531.
- TOLBERT, L. P., MATSUMOTO, S. G. AND HILDEBRAND, J. G. (1983). Development of synapses in the antennal lobes of the moth *Manduca sexta* during metamorphosis. *J. Neurosci.* **3**, 1158–1175.
- TUMLINSON, J. H., BRENNAN, M. M., DOOLITTLE, R. E., MITCHELL, E. R., BRABHAM, A., MAZOMENOS, B. E., BAUMHOVER, A. H. AND JACKSON, D. M. (1989). Identification of a pheromone blend attractive to *Manduca sexta* (L.) males in a wind tunnel. *Archs Insect Biochem. Physiol.* **10**, 255–271.
- VOGT, R. G. (1987). The molecular basis of pheromone reception: its influence on behavior. In *Pheromone Biochemistry* (ed. G. D. Prestwich and G. J. Blomquist), pp. 385–431. New York: Academic Press.
- ZACK-STRAUSFELD, C. (1979). Sensory adaptation in the sex pheromone receptor cells of Saturniid moths. Dissertation, Ludwig Maximilians Universität, München, FRG.
- ZACK-STRAUSFELD, C. AND KAISLING, K.-E. (1986). Localized adaptation processes in olfactory sensilla of Saturniid moth. *Chem. Senses* **11**, 499–512.
- ZIEGELBERGER, G., VAN DEN BERG, M. J., KAISLING, K.-E., KLUMPP, S. AND SCHULTZ, J. E. (1990). Cyclic GMP levels and guanylate cyclase activity in pheromone-sensitive antennae of the silkmoths *Antheraea polyphemus* and *Bombyx mori*. *J. Neurosci.* **10**, 1217–1225.
- ZUFALL, F., FIRESTEIN, S., GERARDO, H. F. AND SHEPHERD, G. M. (1991a). Inhibition of odor-sensitive cyclic nucleotide gated channels by intracellular Ca<sup>2+</sup>: a possible mechanism for sensory adaptation. *Soc. Neurosci. Abstr.* **17**, 958.
- ZUFALL, F. AND HATT, H. (1991). Dual activation of a sex pheromone-dependent ion channel from insect

olfactory dendrites by protein kinase C activators and cyclic GMP. *Proc. natn. Acad. Sci. U.S.A.* **88**, 8520–8524.

ZUFALL, F., HATT, H. AND KEIL, T. A. (1991*b*). A calcium-activated nonspecific cation channel from olfactory receptor neurones of the silkmoth *Antheraea polyphemus*. *J. exp. Biol.* **161**, 455–468.

ZUFALL, F., STENGL, M., FRANKE, C., HILDEBRAND, J. G. AND HATT, H. (1991*c*). Ionic currents of cultured olfactory receptor neurons from antennae of male *Manduca sexta*. *J. Neurosci.* **11**, 956–965.
